# Supplementary material for: N-Acetylcysteine Added to Local Anesthesia Reduces Scar Area and Width in Early Wound Healing—An Animal Model Study
Source: MDPI journal article supplement (doi:10.3390/ijms22147549), 2021-07-14
Supplement: s1 [file s1]

## Supplementary materials

**Table S1**–Modified Abramov scale for histological skin wound healing assessment.

| HE Staining                                  |                                                                                                                            | VAS Scale (0.1 increment) |                                                                                                                   |                     |
|----------------------------------------------|----------------------------------------------------------------------------------------------------------------------------|---------------------------|-------------------------------------------------------------------------------------------------------------------|---------------------|
| Parameter                                    | 0                                                                                                                          | 1                         | 2                                                                                                                 | 3                   |
| Acute inflammation                           | None                                                                                                                       | Scant                     | Moderate                                                                                                          | Abundant            |
| Chronic inflammation                         | None                                                                                                                       | Scant                     | Moderate                                                                                                          | Abundant            |
| Granulation tissue amount                    | None                                                                                                                       | Scant                     | Moderate                                                                                                          | Abundant            |
| Granulation tissue fibroblast maturation     | Immature                                                                                                                   | Mild maturation           | Moderate maturation                                                                                               | Fully matured       |
| Collagen deposition                          | None                                                                                                                       | Scant                     | Moderate                                                                                                          | Abundant            |
| Reepithelialization                          | None                                                                                                                       | Partial                   | Complete but immature or thin                                                                                     | Complete and mature |
| Neovascularization                           | None                                                                                                                       | Up to 5 vessels per HPF   | 6-10 vessels per HPF                                                                                              | >10 vessels per HPF |
| Binary                                       |                                                                                                                            |                           |                                                                                                                   |                     |
| Complete wound closure                       | 0                                                                                                                          |                           | 1                                                                                                                 |                     |
| TM Staining                                  |                                                                                                                            | VAS Scale (0.1 increment) |                                                                                                                   |                     |
| Parameter                                    | 0                                                                                                                          |                           | 10                                                                                                                |                     |
| Collagen fiber orientation regularity        | Uniform/regular                                                                                                            |                           | Chatoic/irregular                                                                                                 |                     |
| Collagen fiber density                       | Homogenous                                                                                                                 |                           | Heterogenous                                                                                                      |                     |
| Collagen fiber diameter                      | Uniform/regular                                                                                                            |                           | Variable/irregular                                                                                                |                     |
| Colagen fiber maturity                       | Old/mature fibers                                                                                                          |                           | Newly formed collagen fibers                                                                                      |                     |
| Overall assessment of collagen fiber setting | Unaffected collagen fiber setting - correspond to a normal skin section. Regular fiber orientation, uniform fiber diameter |                           | Chaotic collagen fiber distribution, deposits of a new collagen, variable fiber orientation, diameter and density |                     |
|                                              | 0                                                                                                                          | 1                         | 2                                                                                                                 | 3                   |
| Granulation tissue amount                    | None                                                                                                                       | Scant                     | Moderate                                                                                                          | Abundant            |
| Collagen deposition                          | None                                                                                                                       | Scant                     | Moderate                                                                                                          | Abundant            |

**Table S2**–Definition and measurement technique of wound healing parameters and indexes

| Parameter   | Definition                                                                               | Tool and Measurement Technique                                                                                                     |
|-------------|------------------------------------------------------------------------------------------|------------------------------------------------------------------------------------------------------------------------------------|
| HE Staining |                                                                                          |                                                                                                                                    |
| E           | The thickness of the epithelium at least 1mm away from both edges of the wound           | 5 measurements on both sides of the wound with the line tool, set perpendicularly from stratum corneum to stratum basale.          |
| NE          | The thickness of newly formed epithelium over the scar                                   | 6 measurements with the line tool, set perpendicularly from stratum corneum to stratum basale                                      |
| S           | The distance between the borders of the wound, following the straight line of epidermis. | 3 measurements – straight lines (line tool) between the wound edges                                                                |
| L           | The length of the reepithelialization zone, between the borders of the wound.            | 3 measurements with polygonal tools – surface between wound edges lying on the granulation tissue/stratum basale of the epithelium |

|     |                                                                                                                                 |                                                                                                                                                                   |
|-----|---------------------------------------------------------------------------------------------------------------------------------|-------------------------------------------------------------------------------------------------------------------------------------------------------------------|
| D   | The depth of the wound, from the epidermis line (S line) to the first connective tissue layer at the deepest point of the wound | 3 measurements with the line tool – line starts perpendicular to line S and ends in the deepest point of the wound. If unable to set – left as “0”                |
| T   | The thickness of the connective tissue in the centre of the wound                                                               | 3 measurements with the line tool – line starts in the deepest point of the wound and runs down to the end of subcutaneous tissue. If unable to set – left as “0” |
| N   | The thickness of the natural dermis on both sides of the wound, from the muscle to the epidermis                                | 6 measurements with the line tool, set perpendicularly from stratum corneum to stratum basale (3 per each side of the wound)                                      |
| DPA | Dermal proliferation area                                                                                                       | 3 measurements with the polygonal tool under the wound surface. Measurements contain granulation tissue without inflammatory influx.                              |

#### TM Staining

|                   |                                                                                                                                                              |                                                                                                     |
|-------------------|--------------------------------------------------------------------------------------------------------------------------------------------------------------|-----------------------------------------------------------------------------------------------------|
| H, H <sub>0</sub> | The distance between the first hairs on each border of the wound. H <sub>0</sub> is the initial distance between the first hairs (day 7)                     | 3 measurements with the line tool between first hair follicles of the wound edges                   |
| B, B <sub>0</sub> | Stained in blue and corresponds to a dense scar tissue. B <sub>0</sub> is the total surface of wounded connective tissue in the centre of the wound at day 7 | 3 measurements with the polygonal tool containing connective tissue of the scar without epithelium. |

#### Wound Healing Indexes

|     |                               |                             |
|-----|-------------------------------|-----------------------------|
| SCI | Superficial contraction index | $SCI = \frac{L - S}{L}$     |
| DCI | Deep contraction index        | $DCI = \frac{N - D}{N}$     |
| WSI | Wound severity index          | $WSI = \frac{N - T}{N}$     |
| GHI | Global healing index          | $GHI = SCI + DCI - WSI$     |
| GCI | Global contraction index      | $GCI = SCI + DCI$           |
| HRI | Hair Remodelling Index        | $HRI = \frac{H_0 - H}{H_0}$ |
| MRI | Matrix Remodelling Index      | $MRI = \frac{B_0 - B}{B_0}$ |
| GRI | Global Remodelling Index      | $GRI = \frac{HRI + MRI}{2}$ |

---
